# Supplementary material
Source: PubMed Central journal article supplement (PMC9643646)
Supplement: NIHMS1836907-supplement-1.pdf [file NIHMS1836907-supplement-1.pdf]

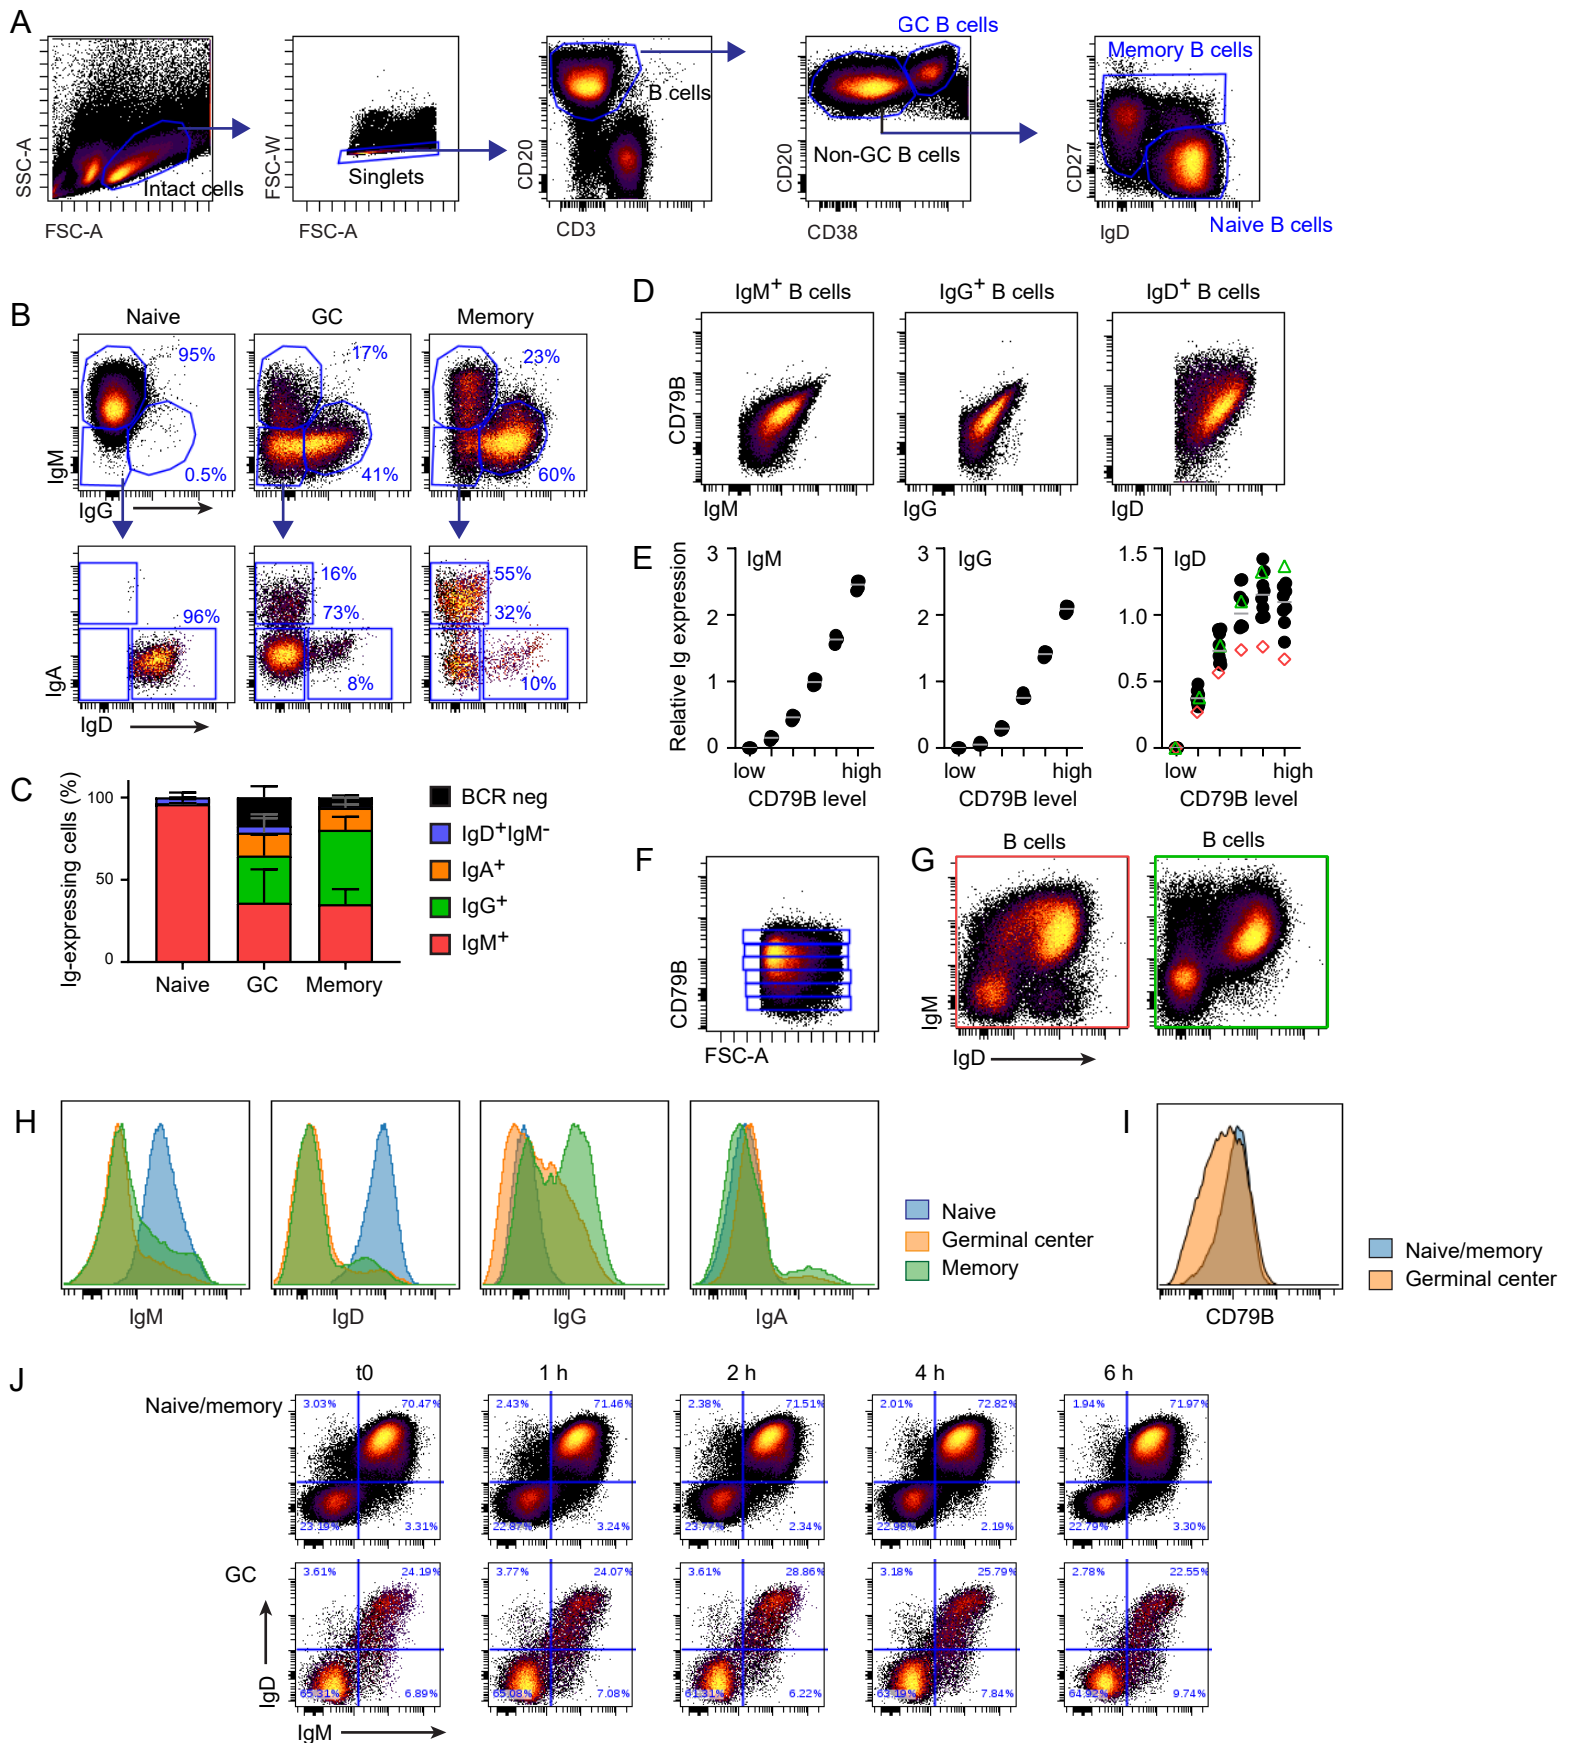

### Supplemental Figure 1.

A-I: Related to Figure 1. **A**. Gating strategy for naive, memory and germinal center (GC) B cells. **B-C**: Percentage of IgM<sup>+</sup>, IgD<sup>+</sup>, IgG<sup>+</sup> and IgA<sup>+</sup> were measured in B cell subsets. One representative tonsil (B) and mean  $\pm$  SD (C) of ten tonsils is shown. **D**. Relationship between CD79B and IgM, IgG or IgD in populations of IgM<sup>+</sup>, IgG<sup>+</sup> and IgD<sup>+</sup> B cells. **E-F**. B cells were gated based on six levels of CD79B and plotted against level of IgM, IgG or IgD expression in IgM<sup>+</sup>, IgG<sup>+</sup> and IgD<sup>+</sup> B cells, respectively. **G**. CD79B and IgD did not show a linear relationship as some tonsils had a large population of IgD<sup>low</sup>IgM<sup>high</sup> B cells. In these cells, the CD79B brought to the surface by IgM will not correlate with IgD expression. **H-I**. Overlaid histograms display the range of Ig expression in B-cell subsets. Although the percentage of positive cells for the different isotypes differs between the subsets, maximum expression level is similar.

**J**. Related to Fig. 2. Single cell suspensions from human tonsils were thawed and stained with anti-IgM F(ab')<sub>2</sub> before culturing. Cells were fixed after 0-6 hours to check the stability of the IgM-FITC signal. After 6 hours, cells from all time points were stained with anti-IgD antibodies in addition to lineage markers.

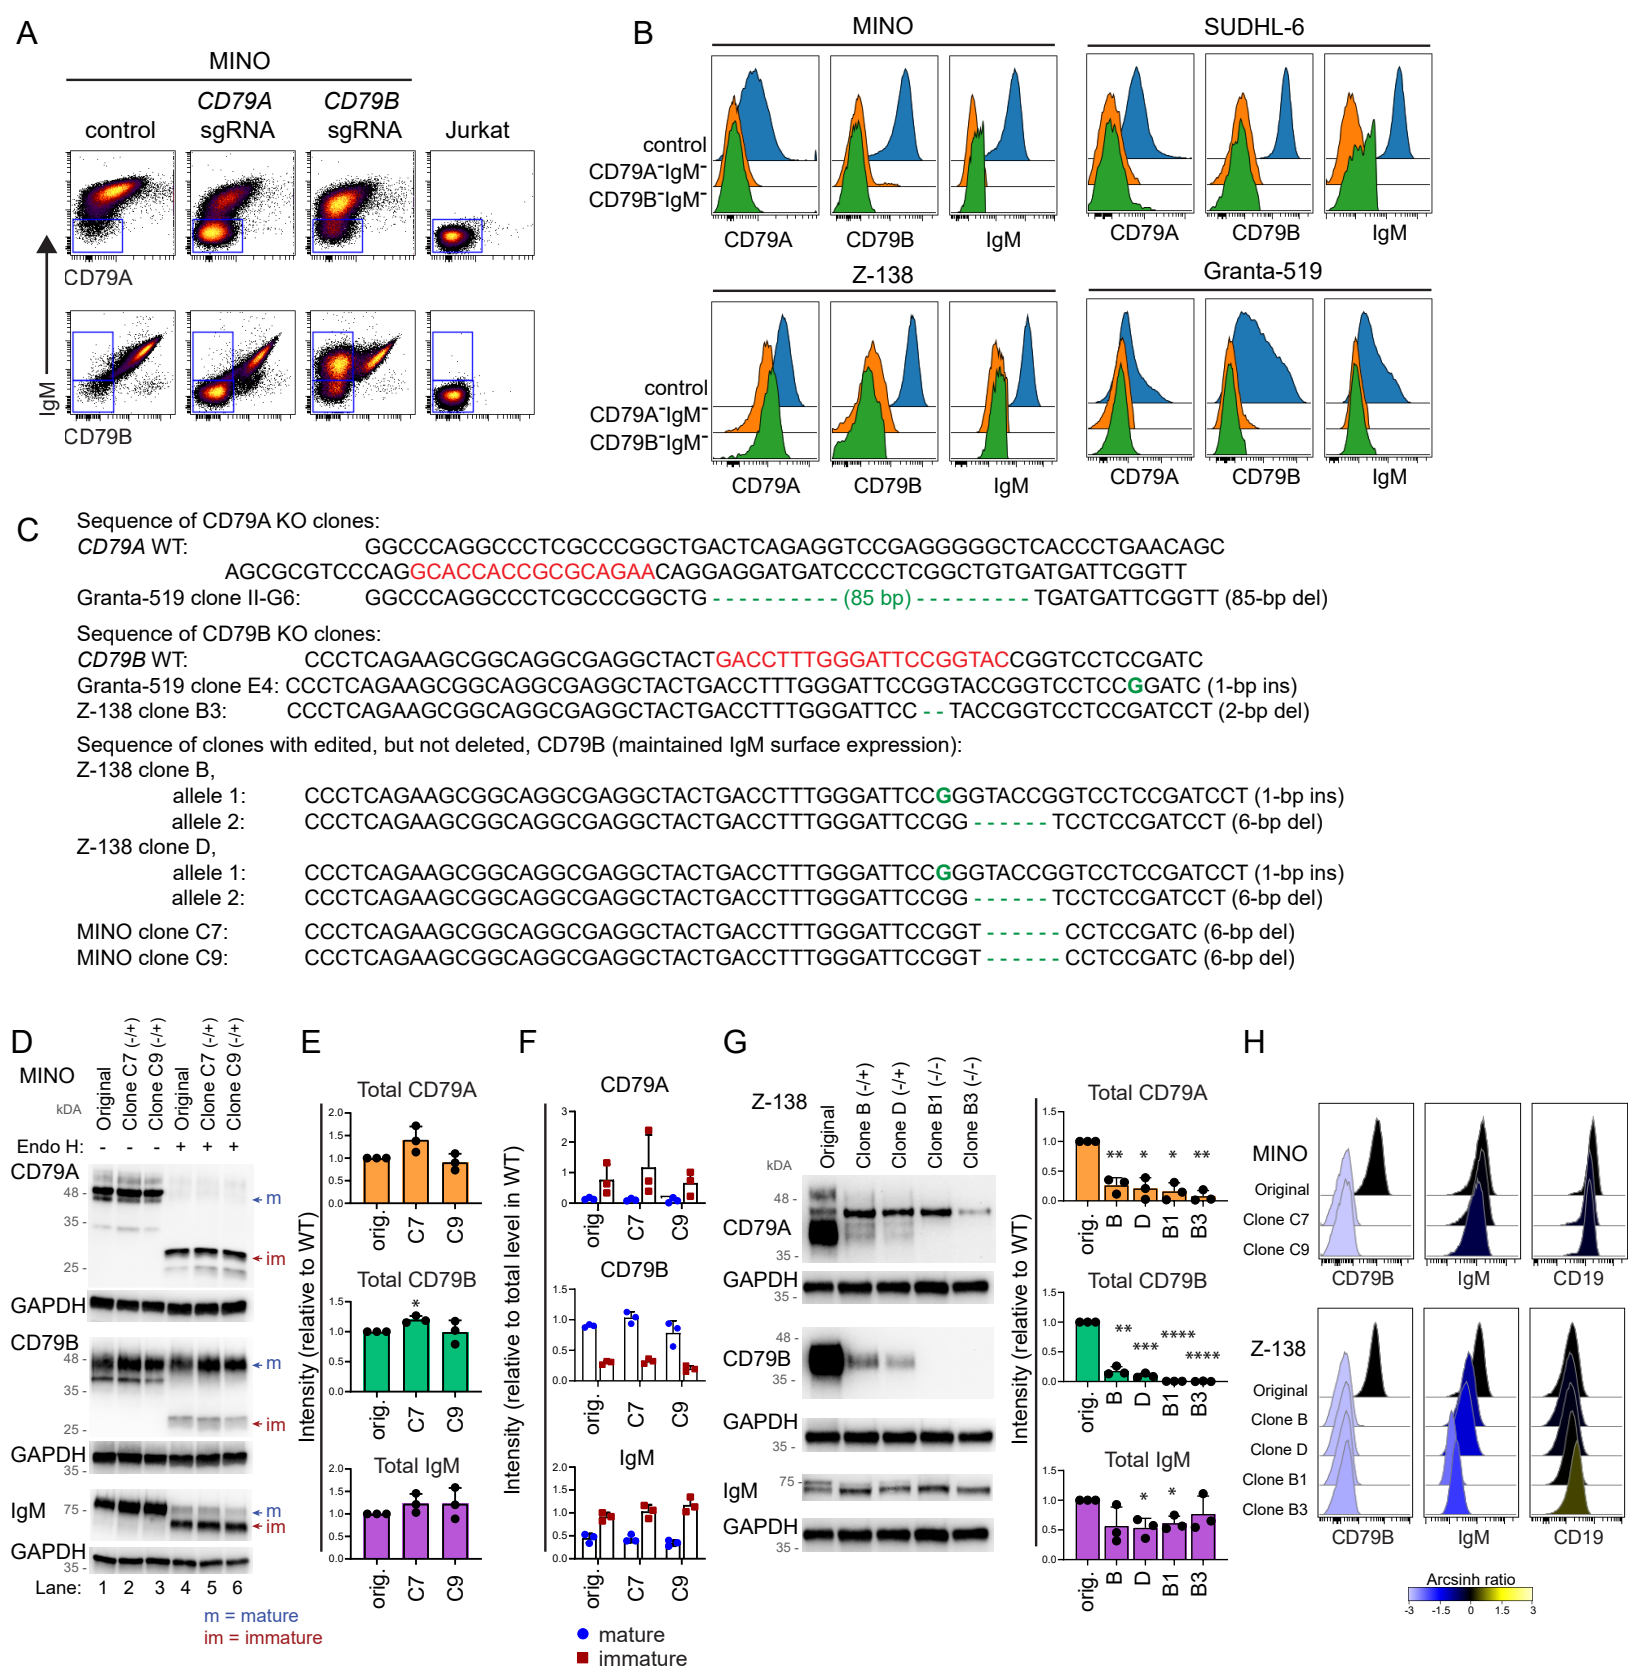

## Supplemental Figure 2.

A-C: Related to Figure 3. **A.** *CD79A*-edited and *CD79B*-edited MINO cells are compared to Jurkat cell which are negative for *CD79A*, *CD79B* and IgM. After *CD79B*-editing, two surface *CD79B*<sup>-</sup> populations appeared whereas only one new population appeared after *CD79A*-editing. **B.** The *CD79A*<sup>-</sup>IgM<sup>-</sup> and the *CD79B*<sup>-</sup>IgM<sup>-</sup> populations from transduced cells of each cell line compared to the original cell lines. **C.** The sequence of *CD79A* and *CD79B* KO clones of Granta-519 and Z-138, and clones of MINO and Z-138 where *CD79B* was edited but not deleted. Red indicates the sgRNA binding sites and green indicates deletion (del) or insertion (ins). **D-F.** Protein lysates from original MINO cells and clone C7 and C9 were left untreated or treated with Endo-H for 1 hour before western blot analysis. One representative out of three experiments (D). The intensity of the bands in lane 1-3 (total protein level; E) and the mature and immature fraction (lane 4-6; F) of *CD79A*, *CD79B* and IgM were quantified and plotted relative to total protein expression in original cells (lane 1). Mean  $\pm$  SD ( $n = 3$ ). \*in E indicates significance after one sample *t*-test comparing sample means of clone C7 and C9 to 1. In F, ANOVA test of mature fraction in *CD79A* negative and *CD79B* KO against original was performed. **G.** Protein lysates from original Z-138 cells and clone B, D, B1 and B3 were analyzed by western blot analysis. One representative out of three experiments. Mean  $\pm$  SD ( $n = 3$ ). \*indicates significance after one sample *t*-test comparing sample means of clone B, D, B1 and B3 to 1. \* $p < 0.05$ , \*\* $p < 0.01$ , \*\*\* $p < 0.001$ , \*\*\*\* $p < 0.0001$ . **H.** Original MINO cells compared to clone C7 and C9 and original Z-138 cells compared to clone B, D, B1 and B3 by flow cytometry.

**A****Granta-519**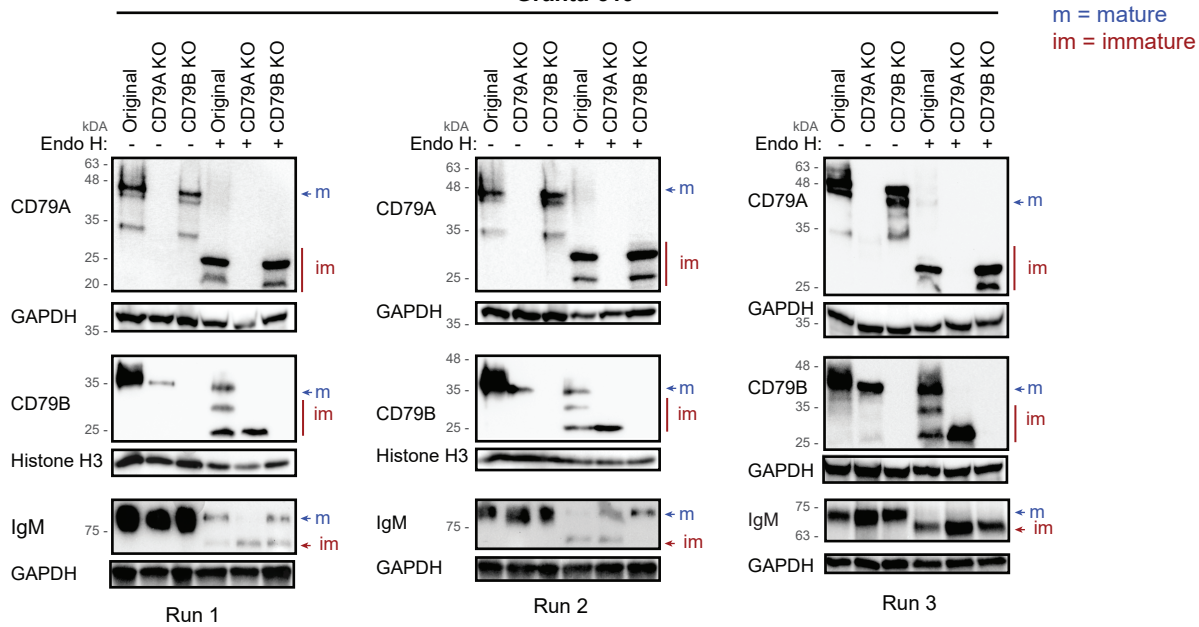**B****Z-138**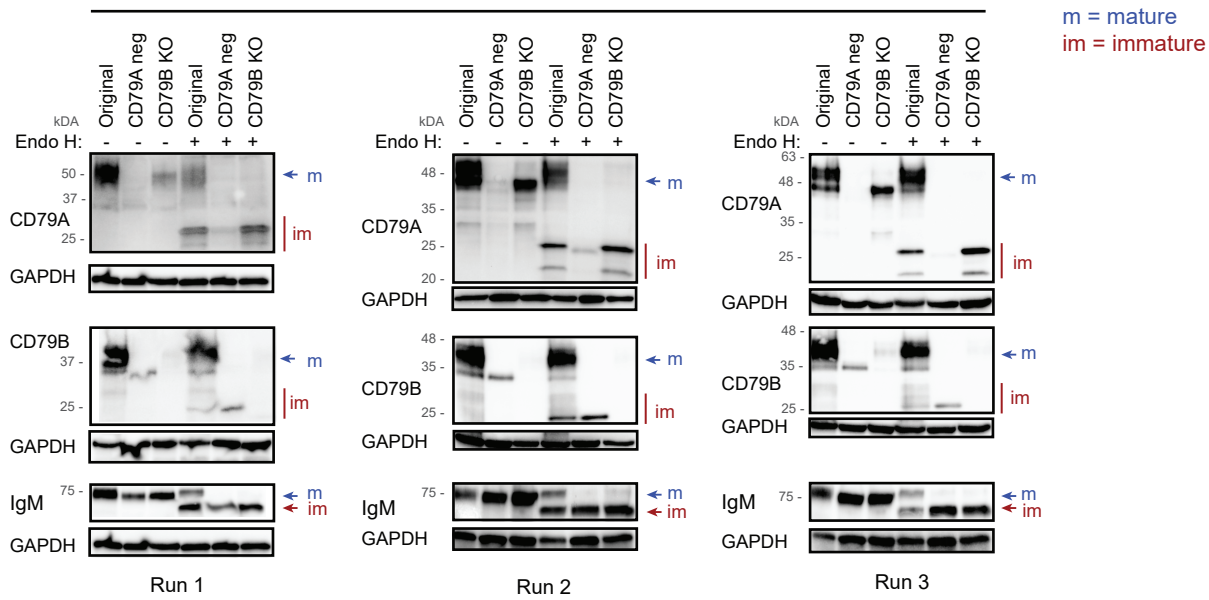

**Supplemental Figure 3.** Showing the three replicates of western blots.

**A.** Related to Figure 5.

**B.** Related to Figure 6.

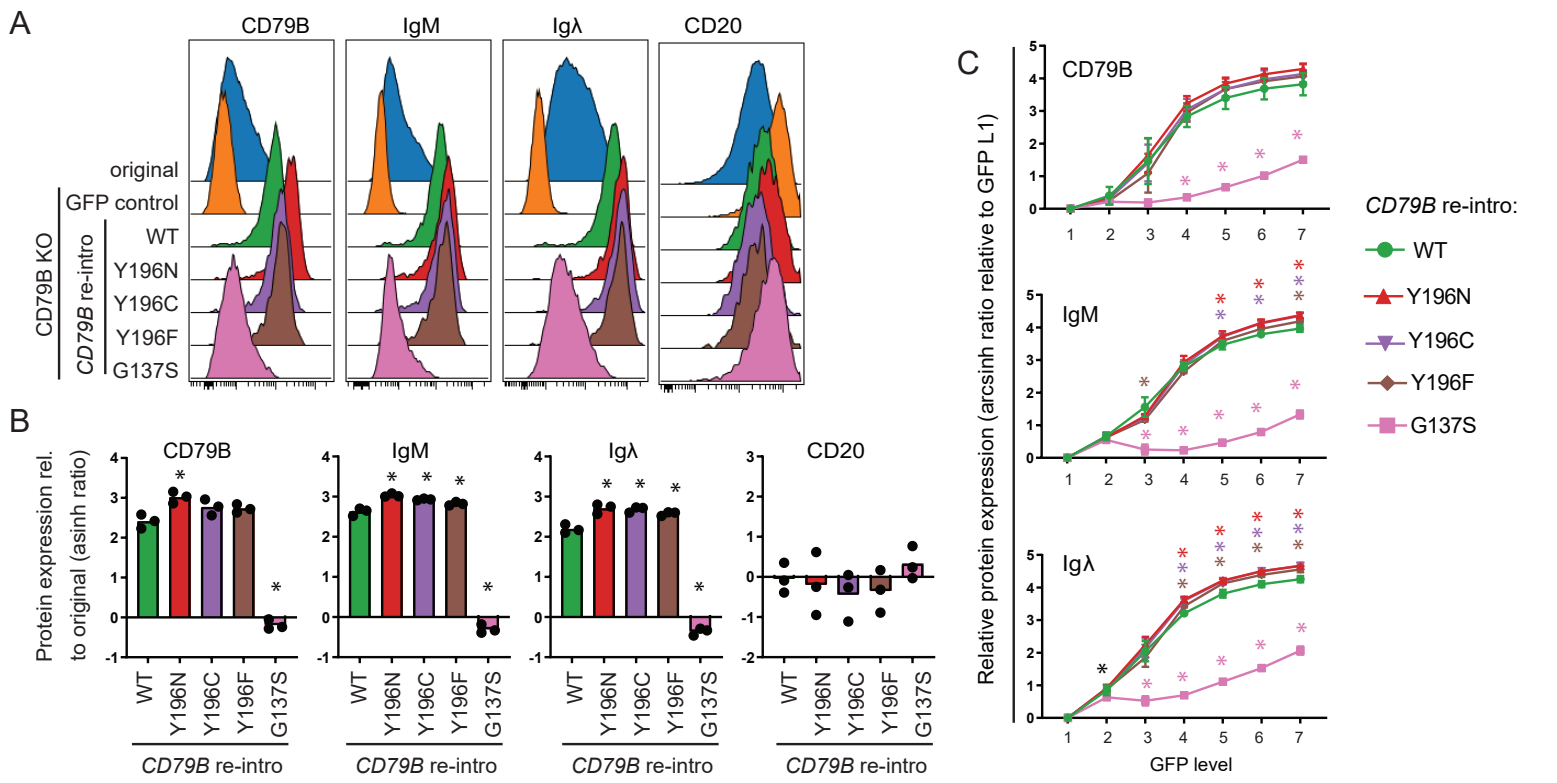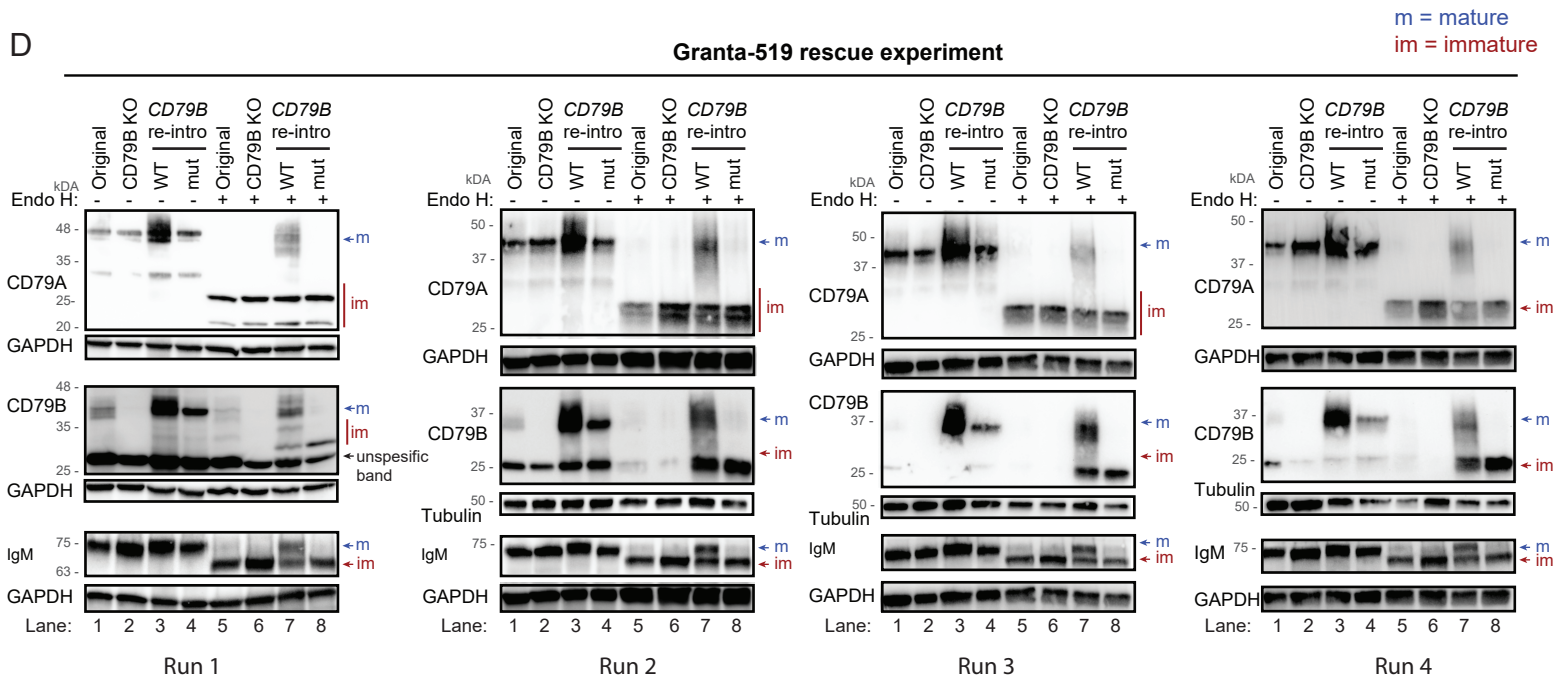

**Supplemental Figure 4.**

*CD79B* WT and the mutants *CD79B* Y196N, *CD79B* Y196C, *CD79B* Y196F and *CD79B* G137S were reintroduced into a Granta-519 *CD79B* KO cells by retroviral transduction.

**A.** Surface protein expression in GFP<sup>+</sup> cells and unmodified Granta-519 cells (original) was measured by flow cytometry.

**B.** Mean values of MFI relative to MFI in original Granta-519 cells. Data points represent separate experiments,  $n = 3$ .

\*  $p \leq 0.05$  in ANOVA and Dunnett's test against WT.

**C.** Protein expression (MFI) for 7 levels of GFP expression relative to GFP<sup>-</sup> cells.  $n = 3$ , mean  $\pm$  SD, \*  $p \leq 0.05$  in ANOVA and Dunnett's test against WT (colored as in legend).

**D.** Related to Figure 7. Showing the three replicates of western blots.
